# Supplementary material for: 3D printable, tough, magnetic hydrogels with programmed magnetization for fast actuation
Source: Royal Society of Chemistry journal article supplement (doi:10.1039/d1tb01694f), 2021-01-01
Supplement: d1tb01694f1.pdf [file d1tb01694f1.pdf]

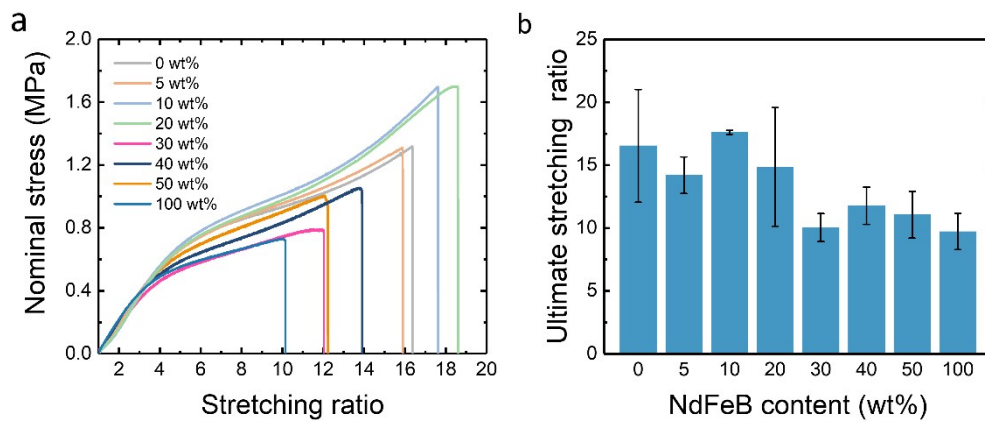

**Figure S1.** (a) Stress-strain curves and (b) ultimate stretching ratio for magnetic hydrogels with different NdFeB concentrations. The curves for 0, 5, 10, and 20 wt% have been shown in Figure 3b.

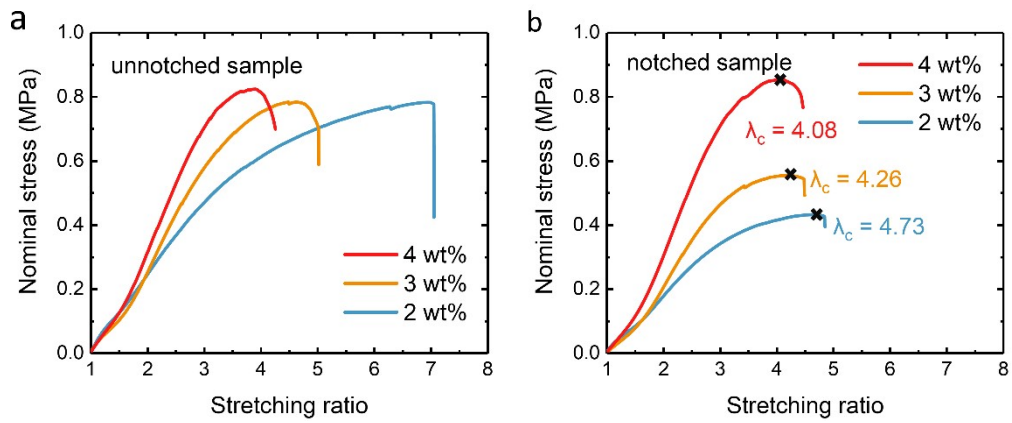

**Figure S2.** Stress-strain curves of the pure-shear test for magnetic hydrogels with different microgel content.
